# Supplementary material for: Shank2 identifies a subset of glycinergic neurons involved in altered nociception in an autism model
Source: Springer Nature journal article supplement (doi:10.1186/s13229-023-00552-7), 2023-06-14
Supplement: MOESM1 [file 25486344]

## **Additional File 1**

- Supplementary Figure 1
- Supplementary Figure 2
- Supplementary Figure 3
- Supplementary Figure 4
- Supplementary Figure 5
- Supplementary Figure 6
- Supplementary Figure 7
- Supplementary Table 1
- Supplementary Table 2
- Source data file 1

WT - spinal cord

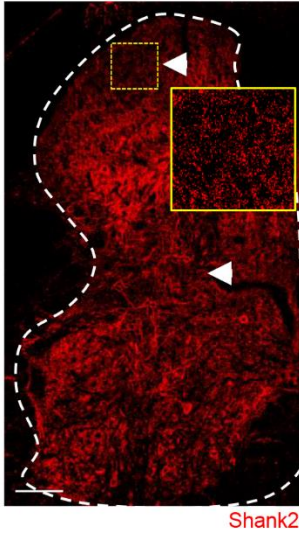

Shank2

### Supplementary Figure 1: Shank2 spinal cord localisation.

Immunofluorescence staining of WT spinal cord sections (unfiltered image from figure 2a) show differential expression level of Shank2 throughout the spinal cord, with a baseline level of Shank2 in laminae I, II and laminae VII (white arrows), a higher expression of Shank2 was observed in laminae III-V (Shank2<sup>high</sup> cells) and in the ventral horn. N = 3. Scale bar 100µm.

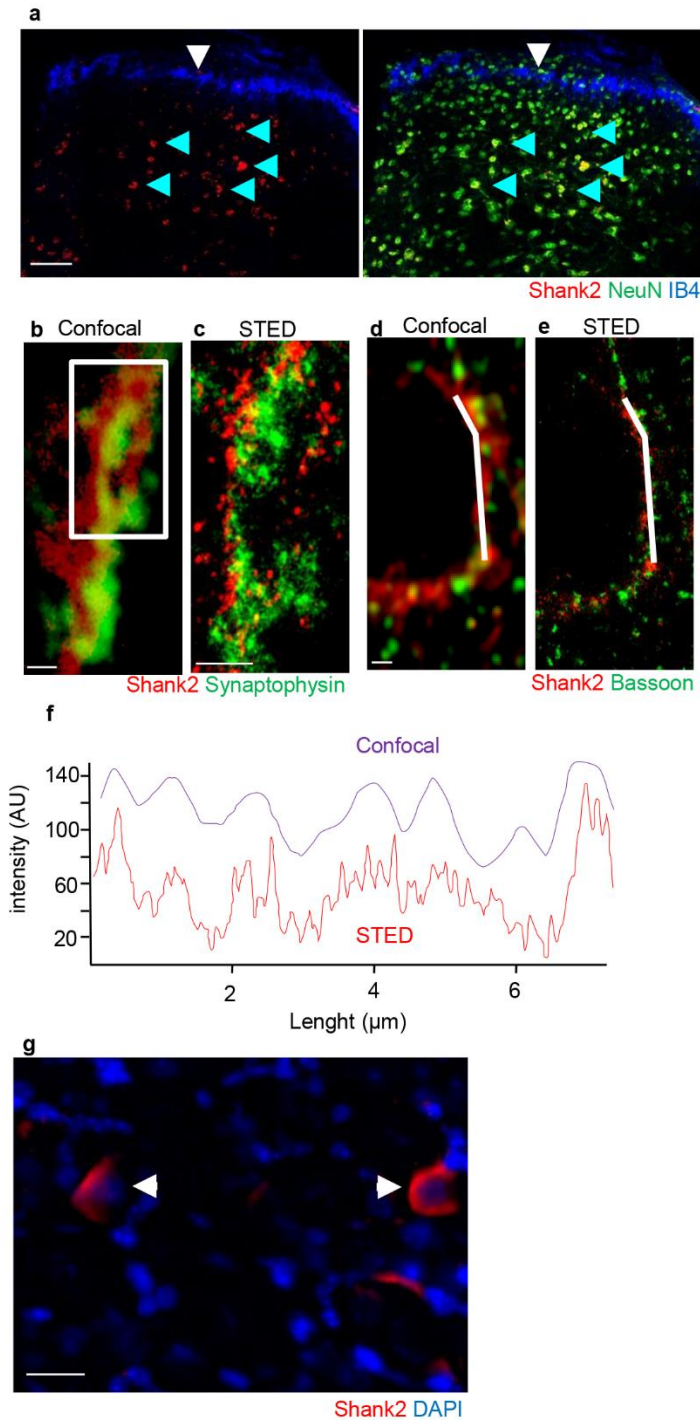

## Supplementary Figure 2: Shank2 architecture and localisation.

**(a)** Confocal images of Shank2 together with IB4 identify  $\text{Shank2}^{\text{high}}$  neurons are located below laminae II (approx. 90%), with a small number of  $\text{Shank2}^{\text{high}}$  neurons in the IB4 ribbon. **(b)** Confocal images of Shank2 and Synaptophysin show a band of Shank2 colocalized with Synaptophysin; (N = 3) scale bar: 500nm. **(c)** STED images of Shank2 and Synaptophysin reveal the punctuated pattern of Shank2 and Synaptophysin; (N = 3) scale bar: 500nm. **(d)** Confocal images of Shank2 and Bassoon show a band of Shank2 colocalized with Bassoon puncta; (N = 3) scale bar: 500nm. **(e)** STED images of Shank2 and Bassoon reveal the punctuated pattern of Shank2 with Bassoon; (N = 3) scale bar: 500nm. **(f)** Graphical view of the fluorescence

intensity of STED imaging in comparison to confocal microscopy. **(g)** Dorsal root ganglion staining with Shank2 revealed low shank2 intensity in only a few cells; scale bar: 10 $\mu\text{m}$ .

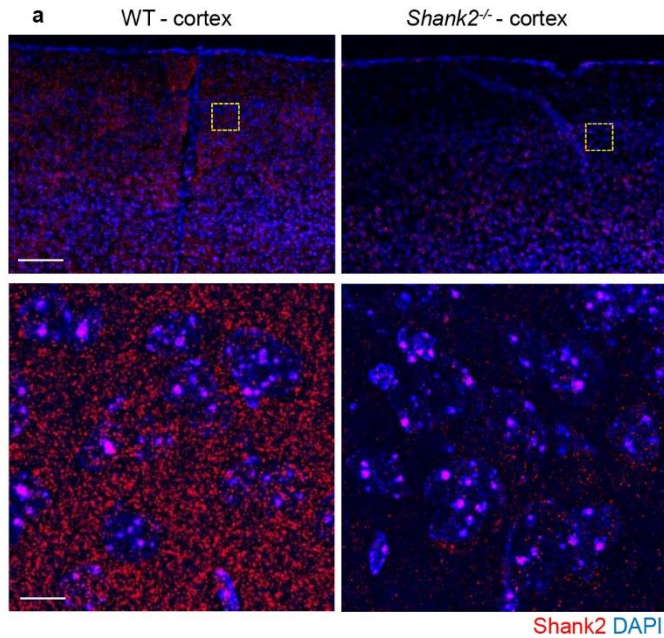

**Supplementary Figure 3: Loss of Shank2 immunoreactivity in cerebral cortex from *Shank2*<sup>-/-</sup> mice.**

**(a)** Shank2 immunofluorescence staining of WT and *Shank2*<sup>-/-</sup> cortical sections shows a homogeneous expression of Shank2 in WT and little to no expression in *Shank2*<sup>-/-</sup> sections. N = 3. Scale bar overview: 100 $\mu$ m; insert: 10 $\mu$ m.

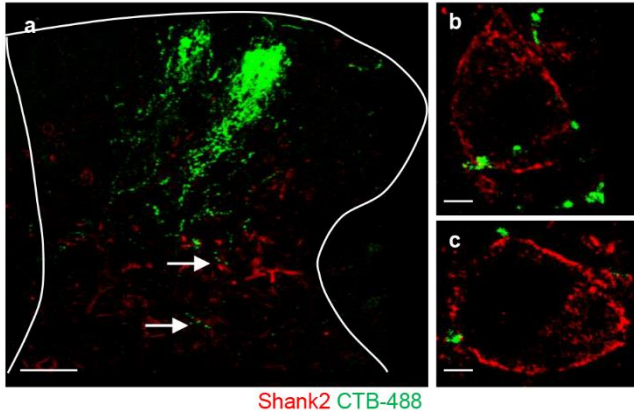

**Supplementary Figure 4: CTB-488 injections reveal cutaneous afferents on Shank2<sup>high</sup> expressing neurons.**

**(a-c)** Detection of GFP positive buttons on Shank2 positive terminals after Cholera Toxin B subunit injection in the hairy skin to show cutaneous afferents on Shank2<sup>high</sup> expressing neurons; (N = 3) scale bar;

A: 50 $\mu$ m, scale bar B and C: 5 $\mu$ m.

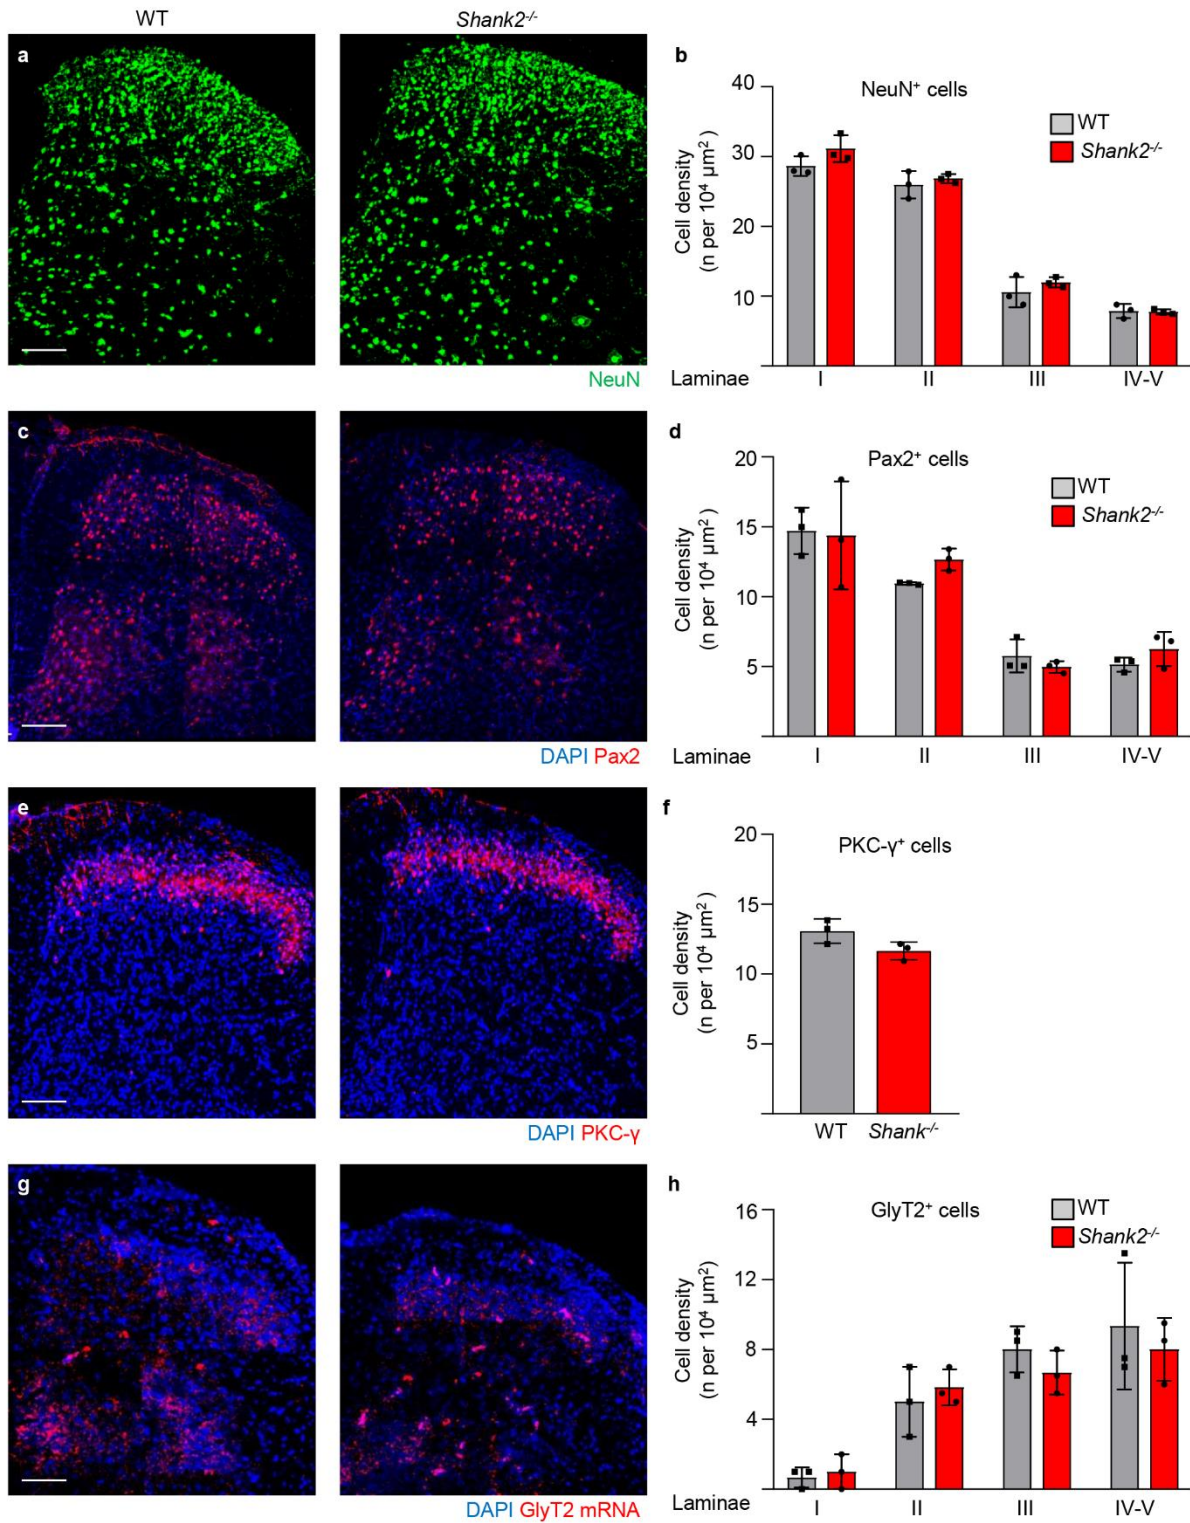

**Supplementary Figure 5: No difference in neuronal architecture in the spinal cord of Shank2<sup>-/-</sup> mice.**

**(a, b)** Neu-N staining in the spinal cord reveals no differences in Neuronal counts between the WT and Shank2<sup>-/-</sup> across Laminae (29.4±1.9 vs 30.3±2.3; 26.1±1.6 vs 25.5±2.7; 11.1±2.1 vs 12.0±0.6; 7.8±0.8 vs 7.9±0.4; per 10<sup>4</sup> μm<sup>2</sup>; Laminae I-IV/V respectively; WT vs Shank2<sup>-/-</sup>; p>0.05); (N = 3) scale bar: 100nm. **(c, d)** PAX2 staining in the spinal cord shows no differences in the density of inhibitory neurons between the WT and Shank2<sup>-/-</sup> (15.2±1.4 vs 15.0±3.2; 11.2±0.5 vs 12.2±0.7; 5.9±1.1 vs 4.7±0.7; 5.3±0.4 vs 5.7±1.0; per 10<sup>4</sup> μm<sup>2</sup>; Laminae I-IV/V respectively; WT vs Shank2<sup>-/-</sup>; p>0.05); (N = 3) scale bar: 100nm. **(e, f)** PKC-γ staining in the spinal cord results in no difference in the number of excitatory cells between WT and Shank2<sup>-/-</sup> (13.2±1.5 vs 11.7±1.3; per 10<sup>4</sup> μm<sup>2</sup>; WT vs Shank2<sup>-/-</sup>; p>0.05); (N = 3) scale bar: 100nm. **(g, h)** single mRNA in situ hybridisation with GlyT2 in the spinal cord reveals no differences in the density of Glycinergic interneurons between WT and Shank2<sup>-/-</sup> (0.1±0.1 vs 0.1±0.2; 1.4±0.5 vs 1.5±0.4; 1.6±0.5 vs 1.7±0.4; 2.2±0.7 vs 2.1±0.5; per 10<sup>4</sup> μm<sup>2</sup>; Laminae I-IV/V respectively; WT vs Shank2<sup>-/-</sup>; p>0.05); (N = 3) scale bar: 100nm. Data shown as average±SD.



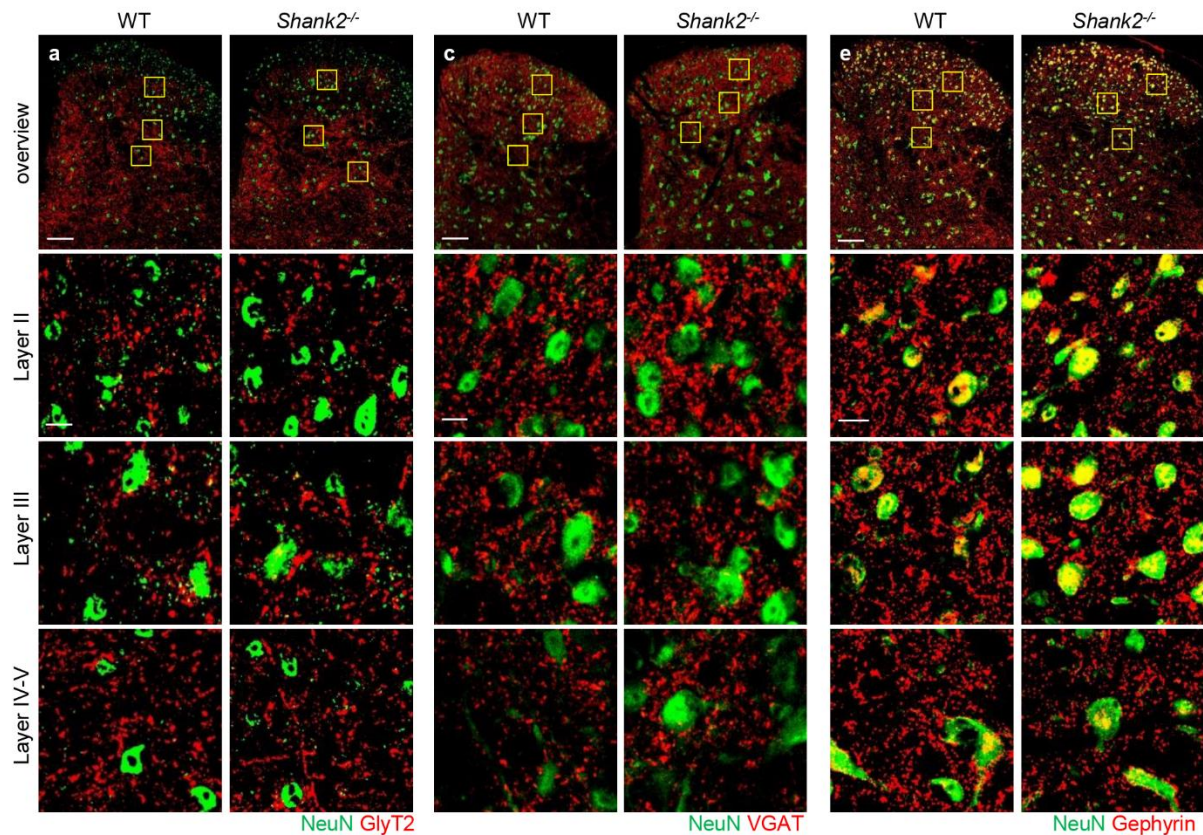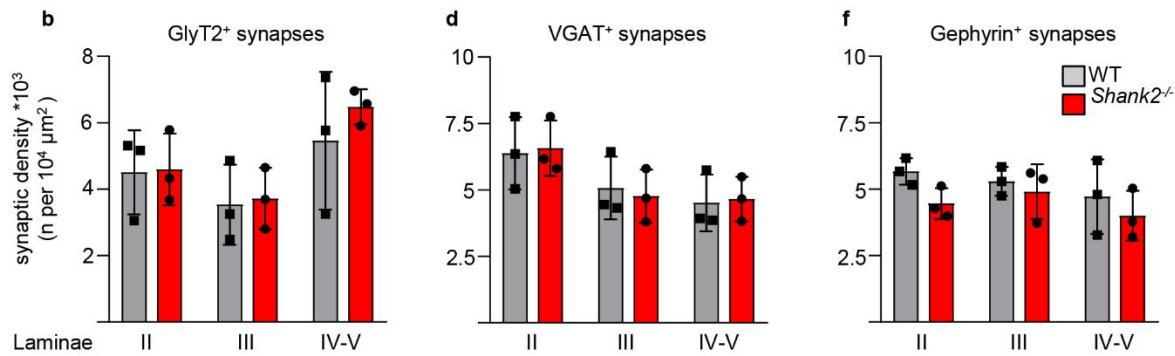

**Supplementary Figure 6: No difference in inhibitory synapses in the spinal cord of *Shank2*<sup>-/-</sup> mice.**

**(a, b)** GlyT2 staining in the spinal cord reveals no differences in the GlyT2 synaptic density between WT and *Shank2*<sup>-/-</sup> across all laminae ( $4.5 \pm 1.6$  vs  $4.6 \pm 1.4$ ;  $3.5 \pm 1.7$  vs  $3.7 \pm 1.1$ ;  $5.5 \pm 2.1$  vs  $6.5 \pm 8.8 \cdot 10^3$ , per  $10^4 \mu\text{m}^2$ ; Laminae II, III and IV respectively; WT vs *Shank2*<sup>-/-</sup>;  $p > 0.05$ ); (N = 3). **(c, d)** VGAT staining in the spinal cord reveals no differences in the VGAT synaptic density between WT and *Shank2*<sup>-/-</sup> across all laminae



(6.3±1.9 vs 6.5±1.5; 4.9±1.6 vs 4.7±1.4; 4.4±1.4 vs 4.6±1.0 \*10<sup>3</sup>; per 10<sup>4</sup> μm<sup>2</sup>; Laminae II, III and IV respectively; WT vs Shank2<sup>-/-</sup>; p>0.05); (N = 3). **(e, f)** Gephyrin staining in the spinal cord reveals no differences in the Gephyrin synaptic density between WT and Shank2<sup>-/-</sup> across all laminae (5.7±1.0 vs 4.5±1.6; 5.3±1.1 vs 4.9±1.8; 4.7±1.8 vs 4.0±1.5 \*10<sup>3</sup>; per 10<sup>4</sup> μm<sup>2</sup>; Laminae II, III and IV respectively; WT vs Shank2<sup>-/-</sup>; p>0.05); (N = 3). Scale bar overview: 100μm, scale bar insert: 10μm. Data shown as average±SD.

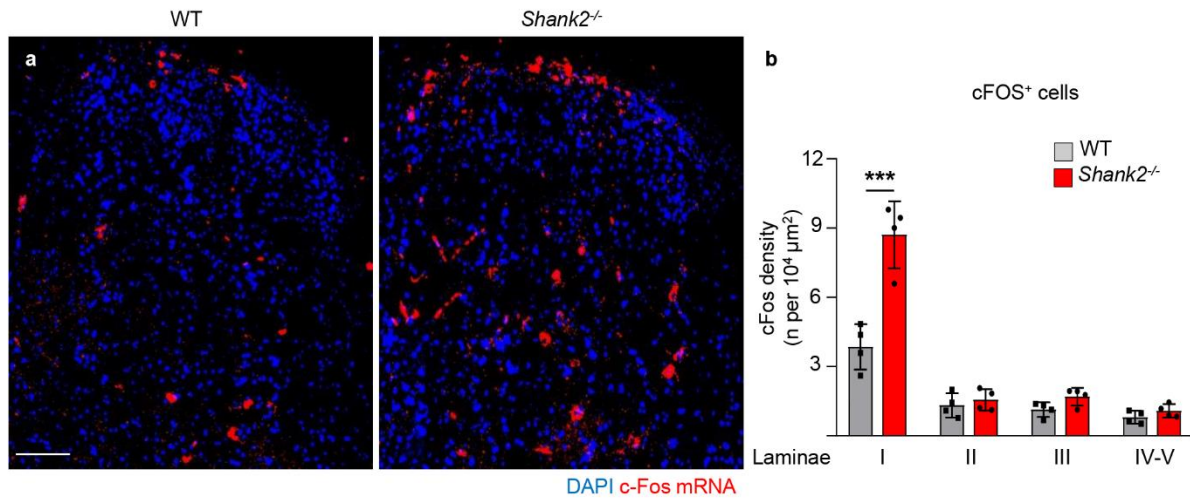

**Supplementary Figure 7: Increased number of cFos mRNA+ interneurons in Laminae I upon Formalin injection**

**(a, b)** Single mRNA detection show a strong increase in c-fos expressing cells in laminae I ( $p < 0.001$ ), however this effect disappears in Laminae II-IV/V ( $1.5 \pm 0.6$  vs  $1.6 \pm 0.5$ ;  $1.2 \pm 0.3$  vs  $1.7 \pm 0.4$ ;  $0.8 \pm 0.2$  vs  $1.1 \pm 0.3$ ; per  $10^4 \mu\text{m}^2$ ; Laminae II-IV/V respectively; WT vs *Shank2*<sup>-/-</sup>;  $p > 0.05$ ) upon formalin injection; (N = 4) scale bar A: 100μm. Data shown as average  $\pm$  SD. \*\*\*  $p < 0.001$ .

| <b>Antigen (primary antibody)</b>      | <b>Catalogue number</b> | <b>Company</b>     | <b>Dilution</b>                        |
|----------------------------------------|-------------------------|--------------------|----------------------------------------|
| Chicken anti GFP                       | Ab13970                 | Abcam              | 1:1000 (IF)                            |
| Rabbit anti RFP                        | 600-401-379             | Rockland           | 1:500 (IF)                             |
| Goat anti Parvalbumin                  | PVG-214                 | Swant              | 1:2000 (IF)                            |
| Mouse anti Gephyrin                    | 147011                  | Synaptic Systems   | 1:500 (IF)                             |
| Goat anti Glycine Transporter 2        | SC-16705                | Santa Cruz         | 1:200 (IF)                             |
| Rabbit anti Glycine Transporter 2      | 272003                  | Synaptic Systems   | 1:200 (IF)                             |
| Mouse anti NeuN                        | MAB377                  | Millipore          | 1:100 (IF)                             |
| Guinea pig anti vGlut1                 | 135304                  | Synaptic Systems   | 1:500 (IF), 1:200 (RNAscope, clearing) |
| Guinea pig anti vGlut2                 | 135404                  | Synaptic Systems   | 1:500 (IF), 1:200 (RNAscope)           |
| Guinea pig anti VGAT                   | 131004                  | Synaptic Systems   | 1:500 (IF)                             |
| Rabbit anti c-fos                      | SC-52                   | Santa Cruz         | 1:500 (IF)                             |
| Mouse anti Bassoon                     | ADI-VAM-PS003-D         | Enzo Life Sciences | 1:500 (IF, STED)                       |
| Mouse anti Synaptophysin               | MAB5258                 | Millipore          | 1:1000 (IF, STED)                      |
| Rabbit anti Pax-2                      | PRB-2768                | Covance            | 1:500 (IF)                             |
| Rabbit anti PKC-gamma                  | Ab71558                 | Abcam              | 1:200 (IF)                             |
| Rabbit anti Shank2                     | Homemade                | SA5192             | 1:500 (IF, STED, WB), 1:200 (Clearing) |
| Rabbit anti Homer 1b/c                 | 160022                  | Synaptic Systems   | 1:200 (RNAscope)                       |
| Mouse anti GluN1                       | 114011                  | Synaptic Systems   | 1:200 (RNAscope)                       |
| Mouse anti Neurofilament Marker        | SMI-311R                | Biologend          | 1:300 (IF)                             |
| Anti Gs-IB4 Alexa Fluor 488 conjugated | 121411                  | Invitrogen         | 1:1000 (IF)                            |
| Chicken anti MAP2                      | CPCA-MAP2               | Encor              | 1:200                                  |

| <b>Antigen (secondary antibody)</b> | <b>Catalogue number</b> | <b>Company</b> | <b>Dilution</b> |
|-------------------------------------|-------------------------|----------------|-----------------|
| Donkey anti mouse 488               | A21202                  | Invitrogen     | 1:500           |
| Donkey anti mouse 568               | A10037                  | Invitrogen     | 1:500           |
| Donkey anti rabbit 488              | A21206                  | Invitrogen     | 1:500           |
| Donkey anti rabbit 568              | A10042                  | Invitrogen     | 1:500           |
| Donkey anti rabbit 647              | A31573                  | Invitrogen     | 1:500           |
| Donkey anti chicken 488             | SAB4600031              | Sigma          | 1:500           |
| Donkey anti goat 568                | A11057                  | Invitrogen     | 1:500           |
| Donkey anti goat 633                | A21082                  | Invitrogen     | 1:500           |
| Donkey anti guinea pig 568          | 20377                   | Biotium        | 1:500           |
| Goat anti mouse 594 (Atto)          | 76085-1ML-F             | Sigma-Aldrich  | 1:1000 (STED)   |
| Goat anti rabbit 647 (Atto)         | 40839-1ML-F             | Sigma-Aldrich  | 1:1000 (STED)   |
| Goat anti guinea pig 633            | A21105                  | Invitrogen     | 1:500           |

**Supplementary Table 1:** Primary and secondary antibodies used for immunostaining (IF) Fluorescent in Situ Hybridisation (RNAscope) or for western blot (WB).

| <b>Lab ID Nr.</b> | <b>Gender</b> | <b>Age</b> |
|-------------------|---------------|------------|
| <b>34</b>         | Female        | 69         |
| <b>35</b>         | Male          | 75         |
| <b>39</b>         | Female        | 84         |
| <b>41</b>         | Female        | 85         |
| <b>44</b>         | Male          | 94         |

**Supplementary Table 2:** Full details regarding human samples.

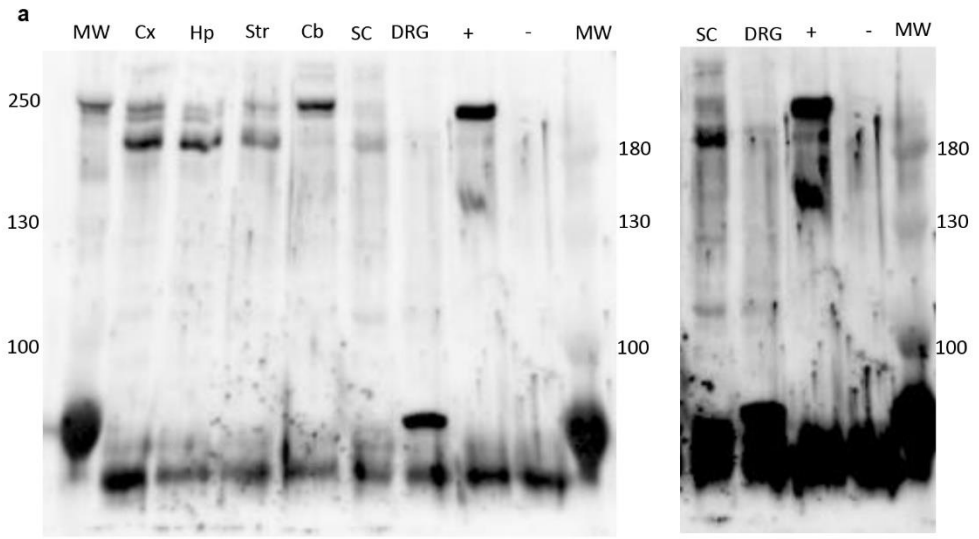

Long exposure  
 +: shank2 overexpression in hek cells  
 -: native hek cells

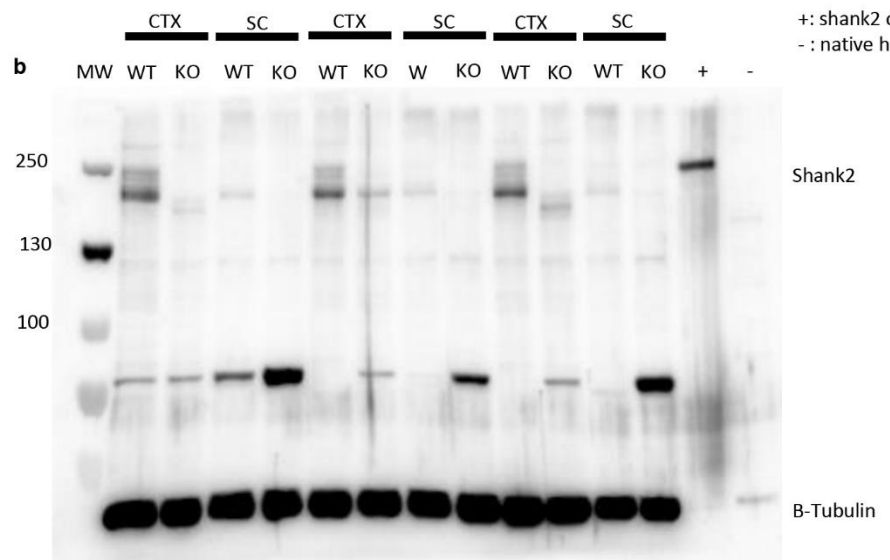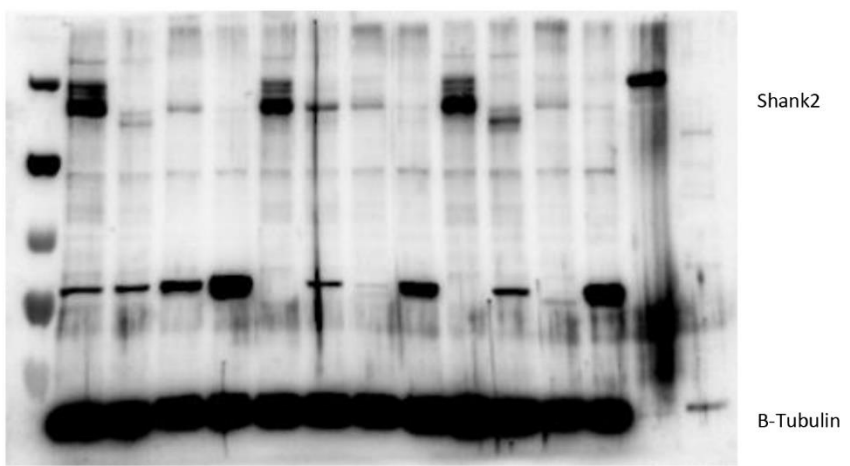

Long exposure



**Source data file 1: uncropped Western Blot of Shank2 in mouse tissue**

**(a)** Shank2 western blot (WB) on mouse tissue samples of various central nervous system (CNS) regions; Cortex (Cx), Hippocampus (Hp), Striatum (Str); Cerebellum (Cb), Spinal Cord (SC), Dorsal Root Ganglia (DRG), positive control (+) and negative control (-). **(b)** Shank2 WB on cortex and spinal cord tissue of WT and Shank2<sup>-/-</sup> (KO) mice.
